# Supplementary material for: Targeting mTOR Pathway in PTEN Deleted Newly Isolated Chordoma Cell Line
Source: MDPI journal article supplement (doi:10.3390/jpm13030425), 2023-02-27
Supplement: s1 [file s1]

**Table S1.** Primary antibodies used in the study.

| <b>Primary Antibody</b> | <b>Company</b>           | <b>Catalog #</b> | <b>Host</b> | <b>Clone</b> | <b>Dilution</b> |
|-------------------------|--------------------------|------------------|-------------|--------------|-----------------|
| Brachyury               | Santa Cruz Biotechnology | Sc-374321        | Mouse       | A-4          | 1:200           |
| Cytokeratin (CK-Pan)    | Dako                     | M0821            | Mouse       | MNF116       | 1:200           |
| EMA                     | Leica Biosystems         | PA0035           | Mouse       | GP1.4        | 1:150           |
| INI1-BAF47              | Becton Dickinson         | 612110           | Mouse       | 25/BAF47     | 1:200           |
| Ki67                    | Dako                     | M7240            | Mouse       | MIB-1        | 1:100           |
| pNDRG1 (Thr346)         | Cell Signaling           | 5482             | Rabbit      | D98G11       | 1:100           |
| pS6 (Ser235/236)        | Cell Signaling           | 4857             | Rabbit      | 91B2         | 1:100           |
| PTEN                    | Dako                     | M3627            | Mouse       | 6H2.1        | 1:100           |
